# Supplementary material for: Differing roles of pyruvate dehydrogenase kinases during mouse oocyte maturation
Source: Oxford University Press journal article supplement (doi:10.1242/jcs.167049), 2015-05-20
Supplement: jcs167049_supp.pdf [file jcs167049_supp.pdf]

**Figure S1**

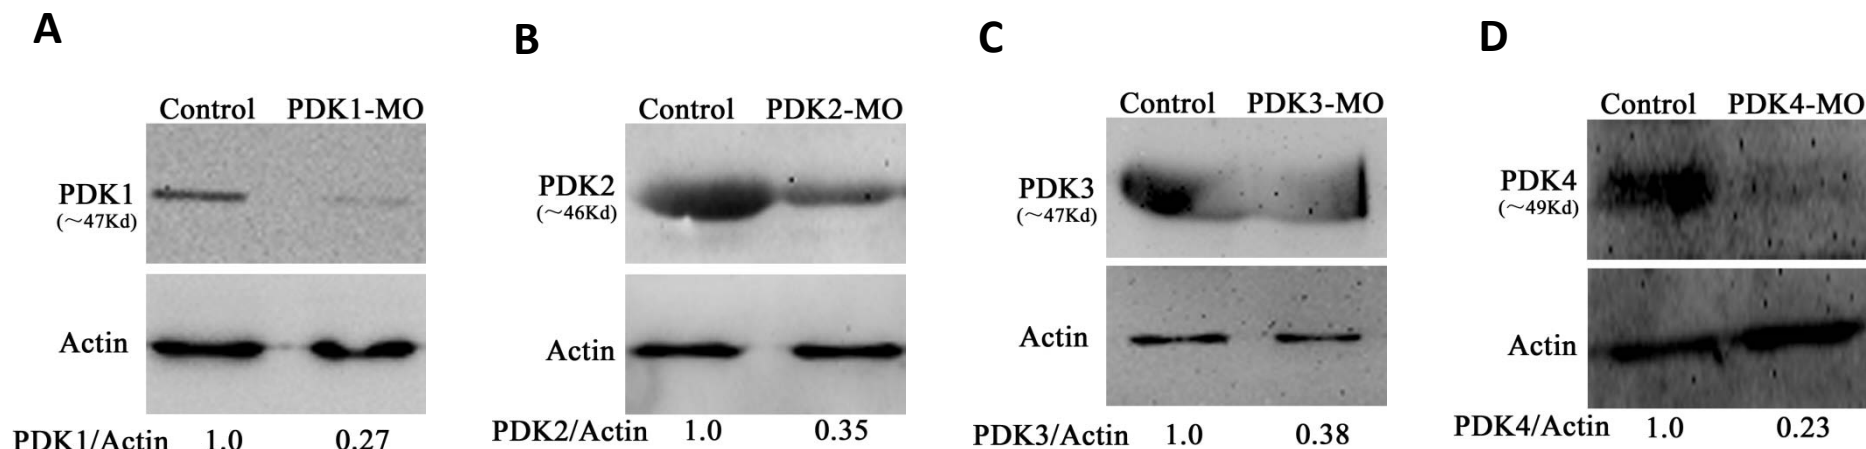

**Suppl Fig. 1 Knockdown of endogenous PDK protein expression with morpholino injection.** Fully-grown oocytes injected with PDK morpholinos (PDK-MO) were arrested at GV stage with milrinone for 20 hours to facilitate blocking of mRNA translation, and then matured in milrinone-free medium. A sham MO standard was injected as control. Western blot showing partial knockdown of PDK1 (A), PDK2 (B), PDK3 (C) and PDK4 (D) after morpholino injection, with actin as a loading control. Band intensity was calculated using Image J software, and the ratio of PDK/Actin expression was normalized and values are indicated. All experiments were repeated at least three times and only the representative gel images are shown.

## Figure S2

**A**

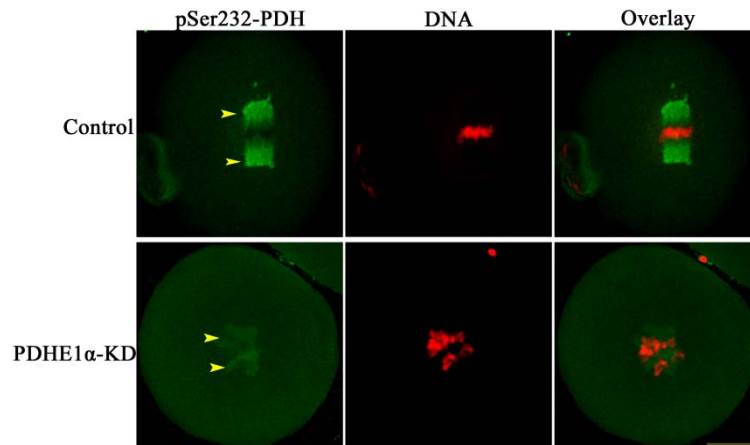

**B**

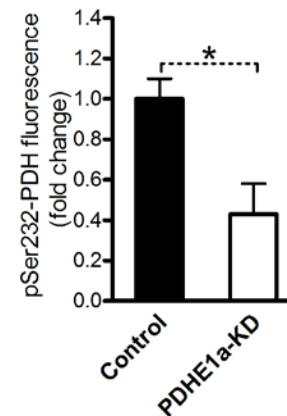

**Suppl Fig. 2 Effects of PDHE1 $\alpha$  knockdown on pSer232-PDH staining in mouse oocytes.** Fully-grown oocytes injected with PDHE1 $\alpha$  morpholino were arrested at GV stage with milrinone for 20 hours to facilitate blocking of mRNA translation, and then matured in milrinone-free medium. A sham MO standard was injected as control. (A) Control and PDHE1 $\alpha$ -KD MII oocytes were stained with pSer232-PDH antibody (green) and counterstained with PI for chromosome (red). Representative confocal sections are shown. (B) Quantification of pSer232-PDH fluorescence in A. Data are expressed as the mean  $\pm$  SD from three independent experiments in which at least 50 oocytes were analyzed. \*  $p < 0.05$  vs controls. Scale bar: 20  $\mu$ m.

**Figure S3**

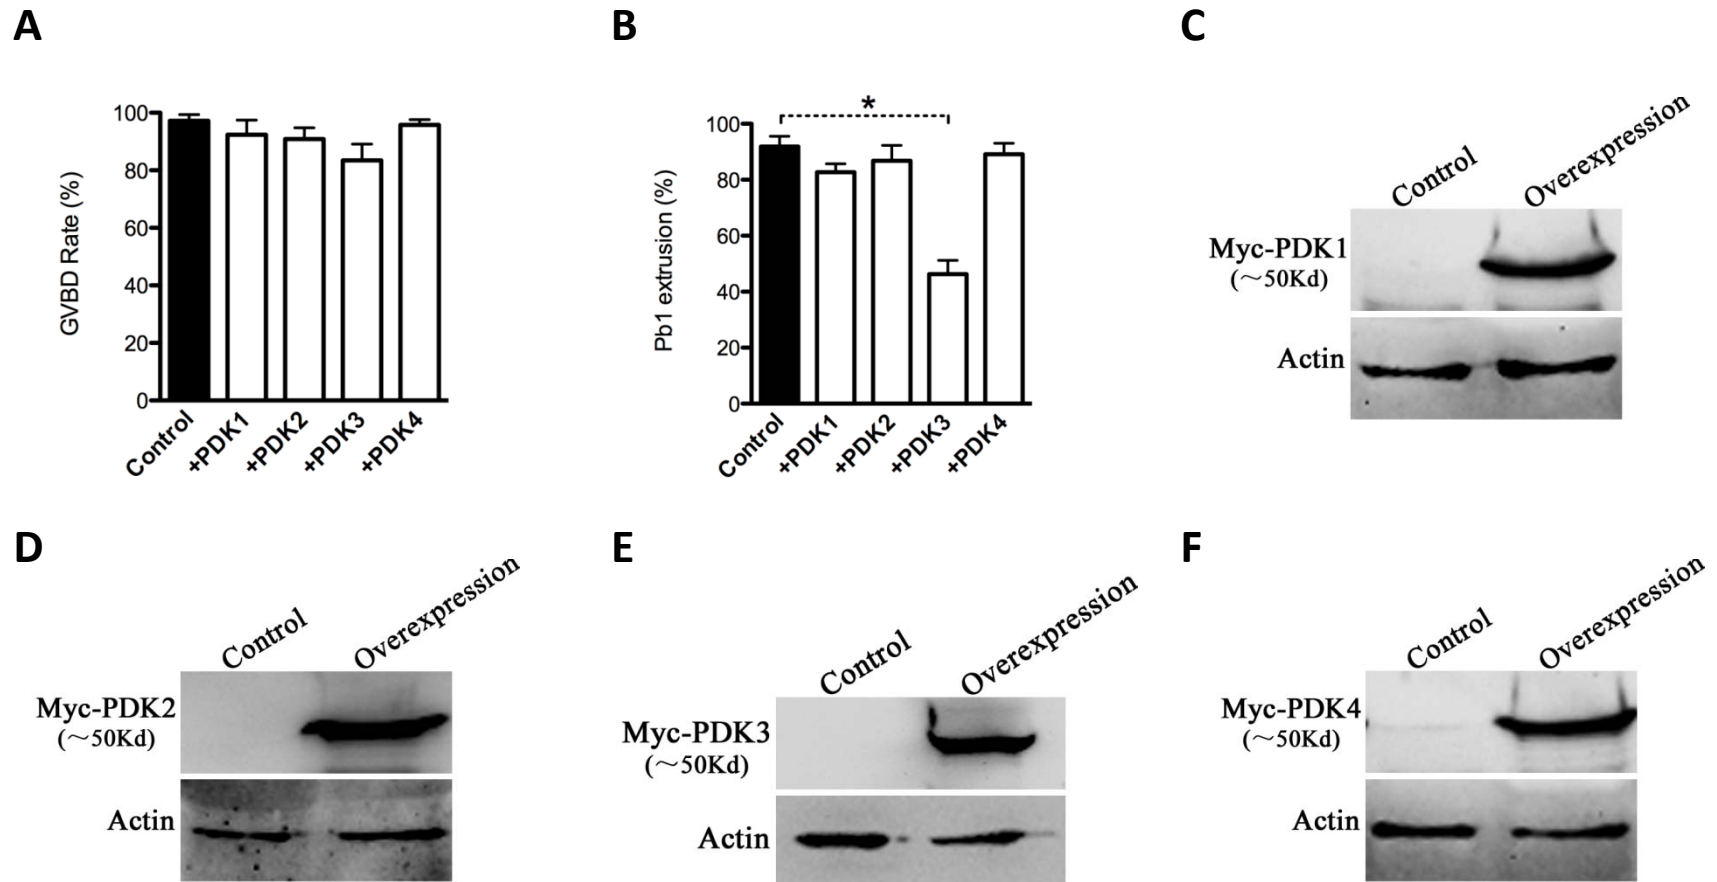

**Suppl Fig. 3 Effects of PDK overexpression on maturational progression.** PBS (control group) or exogenous Myc-PDK mRNA (overexpression group; +PDK) was injected into fully-grown oocytes, which were arrested for 20 hours with milrinone to allow synthesis of new Myc-PDK protein, and then cultured in milrinone-free medium to evaluate the meiotic progression. (A-B) Quantitative analysis of GVBD and Pb1 extrusion in control (n=90), PDK1 (n=120), PDK2 (n=105), PDK3 (n=116) and PDK4 (n=120)-overexpressing oocytes. The graph shows the mean  $\pm$  SD of the results obtained in three independent experiments. \*  $p < 0.05$  vs control. (C-F) Western blot analysis showed that exogenous Myc-PDK1-4 protein was efficiently overexpressed, probing with anti-Myc Tag antibody.

**Figure S4**

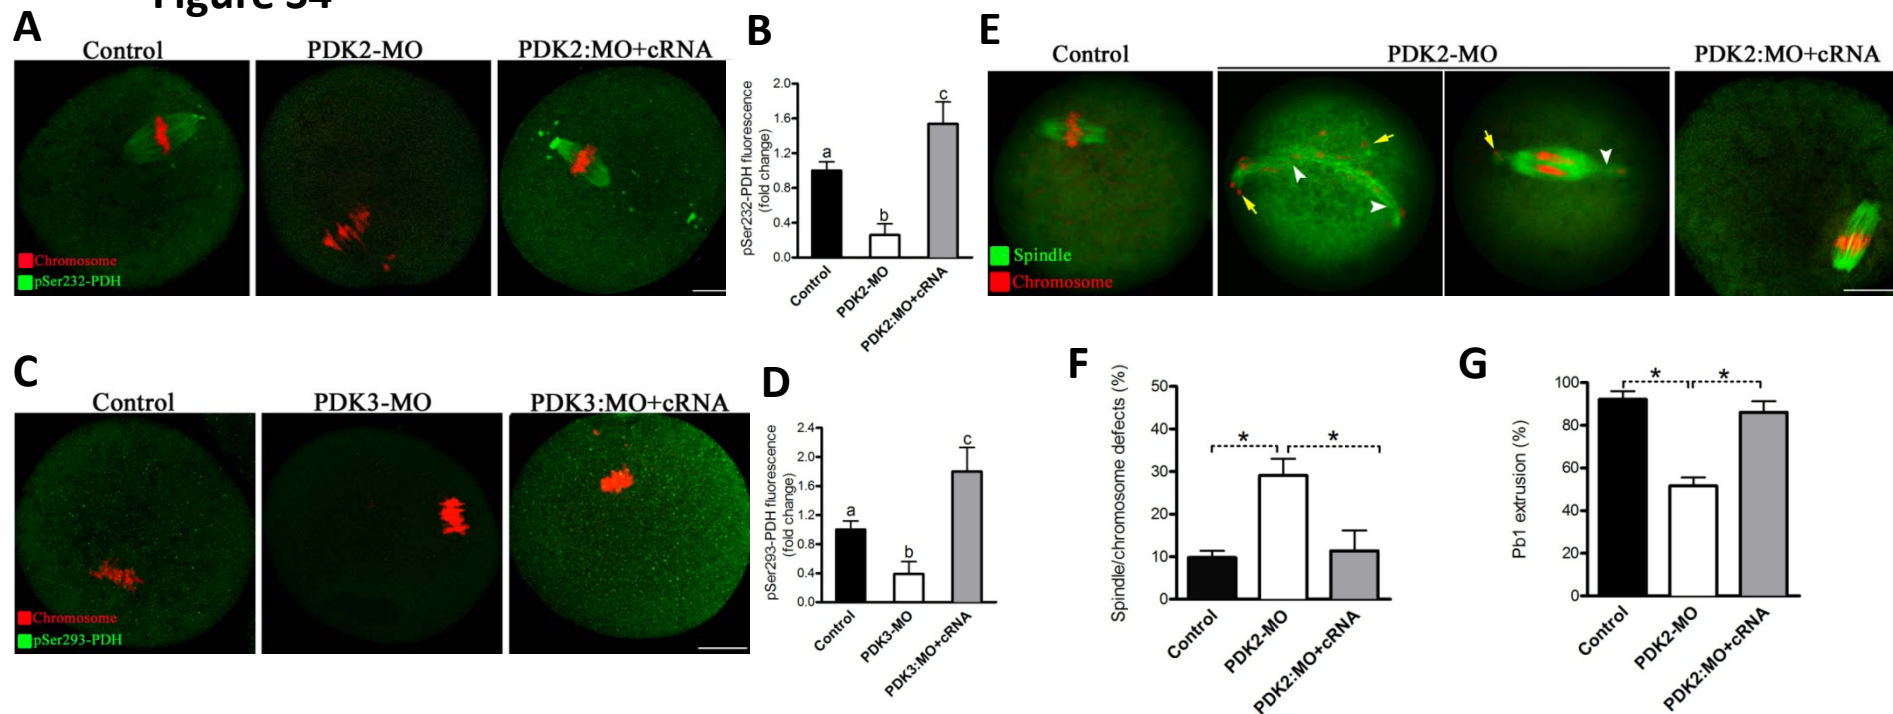

**Suppl Fig. 4 Effects of exogenous PDK mRNA expression on the phosphorylation of Ser232/293-PDH and spindle/chromosome organization in MO-injected oocytes.** cRNA was microinjected into fully-grown oocytes 2h after MO injection, and the immunofluorescence staining with pSer232/293-PDHE1 $\alpha$  antibody, maturational progression, and spindle/chromosome organization were examined after milrinone treatment and in vitro maturation. A sham MO standard was injected as control. (A) Control, PDK2-MO and PDK2:MO+cRNA injected oocytes were stained with pSer232-PDH antibody (green) and counterstained with PI for chromosome (red). (B) Quantification of pSer232-PDH fluorescence in A. (C) Control, PDK3-MO and PDK3:MO+cRNA injected oocytes were stained with pSer293-PDH antibody (green) and counterstained with PI for chromosome (red). (D) Quantification of pSer232-PDH fluorescence in C. For (B) and (D), data are expressed as the mean  $\pm$  SD from three independent experiments in which at least 60 oocytes were analyzed. (E) Control, PDK2-MO and PDK2:MO+cRNA injected oocytes were stained with  $\alpha$ -tubulin antibody to visualize the spindle (green) and counterstained with PI to visualize chromosomes (red). (F) Quantitative analysis of control, PDK2-MO and PDK2:MO+cRNA oocytes with abnormal spindle and chromosomes. (G) Quantitative analysis of Pb1 extrusion in control, PDK2-MO and PDK2:MO+cRNA oocytes. For (F) and (G), data are expressed as mean percentage  $\pm$  SD from three independent experiments in which at least 100 oocytes were analyzed. \* or different superscript letters indicate significant differences. Scale bar: 20  $\mu$ m.

**Table S1** Primer sequences of genes for qRT-PCR

| <i>Gene</i> | <i>Primer sequence</i>                                                                            |
|-------------|---------------------------------------------------------------------------------------------------|
| GAPDH       | Forward Primer: 5' –CTTTGTCAAGCTCATTTCTTGG – 3'<br>Reverse Primer: 5' –TCTTGCTCAGTGTCTTGC – 3'    |
| PDK1        | Forward Primer: 5' –GACTGTGAAGATGAGTGACCG – 3'<br>Reverse Primer: 5' –CAATCCGTAACCAAACCCAG – 3'   |
| PDK2        | Forward Primer: 5' –AAGAGATCAACCTGCTTCCTG – 3'<br>Reverse Primer: 5' –GCATCTGTGAACTGGCTTAGAG – 3' |
| PDK3        | Forward Primer: 5' –CGCCATTACAAGACCACTCC – 3'<br>Reverse Primer: 5' –CAGAGACTTCAGAGACAGCAC – 3'   |
| PDK4        | Forward Primer: 5' –AGTGACTCAAAGACGGGAAAC – 3'<br>Reverse Primer: 5' –GTGTGAGGTTAATTCTGGCG – 3'   |

**Table S2** Primer sequences of genes for cDNA amplification

| <i>Gene</i> | <i>Primer sequence</i>                                                                                                |
|-------------|-----------------------------------------------------------------------------------------------------------------------|
| PDK1        | Forward Primer: 5' –GGGGGCCGGCCG ATGAGGCTGGCAAGGCT – 3'<br>Reverse Primer: 5' –GGGGGCGCGCC TTAAGAGCTTCGGAATGTGG – 3'  |
| PDK2        | Forward Primer: 5' –GGGGGCCGGCCGATGCGCTGGGTCCGG – 3'<br>Reverse Primer: 5' –GGGGGCGCGCCCTAGCTGACCCGATACGTCG – 3'      |
| PDK3        | Forward Primer: 5' –GGGGGCCGGCCGATGCGGCTCTTCTACCGGCT – 3'<br>Reverse Primer: 5' –GGGGGCGCGCCCTAGAAAGTTCTATTACTCT – 3' |
| PDK4        | Forward Primer: 5' –GGGGGCCGGCCGATGAAGGCAGCCCGCTTC – 3'<br>Reverse Primer: 5' –GGGGGCGCGCCTCACACTGCCAGCTTCTCCT – 3'   |

**Table S3** Primer sequences of genes for site-directed mutagenesis of PDHE1a  
The sections responsible for the mutation are highlighted yellow.

| <i>Gene</i> | <i>Primer sequence</i>                                                                                                                                                                                                                                                 |
|-------------|------------------------------------------------------------------------------------------------------------------------------------------------------------------------------------------------------------------------------------------------------------------------|
| PDHE1a      | Forward Primer: 5' –GGGGGCCGGCCGATGAGGAAGATGCTTG – 3'<br>Reverse Primer: 5' –GGGGGCGCGCCTTAAGTACTGACTTAAAC – 3'                                                                                                                                                        |
| PDH-Ser232A | Forward Primer: 5' –CTATGGCATGGGGACG <b>GCT</b> GTTGAGAGAGCAGC – 3'<br>Reverse Primer: 5' –GCTGCTCTCTCAACAGCCGTCCCCATGCCATAG – 3'                                                                                                                                      |
| PDH-Ser232D | Forward Primer: 5' –CTATGGCATGGGGACG <b>GAT</b> GTTGAGAGAGCAGCAG – 3'<br>Reverse Primer: 5' –CTGCTGCTCTCTCAACATCCGTCCCCATGCCATAG – 3'                                                                                                                                  |
| PDH-Ser293A | Forward Primer: 5' –CGCTACCATGGACAC <b>ACC</b> ATGAGTGACCCTGGA – 3'<br>Reverse Primer: 5' –TCCAGGGTCACTCATGGTGTGTCCATGGTAGCG – 3'<br>Forward Primer: 5' –CCGCTACCATGGACAC <b>GCC</b> ATGAGTGACCCTGG – 3'<br>Reverse Primer: 5' –CAGAGCCTCGTGGTACCTCTCCTCGGTGGCGTT – 3' |
| PDH-Ser293D | Forward Primer: 5' –CGCTACCATGGACAC <b>AAC</b> ATGAGTGACCCTGGA – 3'<br>Reverse Primer: 5' –TCCAGGGTCACTCATGGTGTGTCCATGGTAGCG – 3'<br>Forward Primer: 5' –CGCTACCATGGACAC <b>GAC</b> ATGAGTGACCCTGGA – 3'<br>Reverse Primer: 5' –TCCAGGGTCACTCATGTCGTGTCCATGGTAGCG – 3' |
